# Supplementary material
Source: publisher figshare collection journal article supplement (https://gsapubs.figshare.com/ndownloader/files/22604750)
Supplement: Supplementary file 1 [file 22604750]

## Sheet: Chaohu
							carbonate			TOC/TN		TS/TOC
identifier	13Corg	13Ccarb	18O	ΔC	ΔCaverage	15N	TN [%]	TOC [%]	TS [%]	C/N	C/Nmol	S/C	CaCO3[%]	h	h/m total	section	series
35+2.5	-29.442	-0.510435	-6.91474	28.9315	28.6662	1.51957	0.00528494	0.0835582	0.0627387	15.8292	19.7865	0.750839	95.9963	90.78	255.41	South Majiashan	Spathian
35+2.0	-28.7505	-0.587591	-5.62739	28.1629	28.6566	0.987762								90.28	254.91	SMJ	Spathian
35+1.5	-29.5813	-0.677007	-5.97482	28.9043	28.5532	2.49248	0.00996037	0.130592	0.161254	13.1424	16.428	1.2348	93.49	89.78	254.41	SMJ	Spathian
35+1.0	-29.4254	-0.797809	-6.65889	28.6276	28.4783	1.30238								89.28	253.91	SMJ	Spathian
35+0.5	-29.0445	-0.905043	-5.833	28.1395	28.3445	2.14195								88.78	253.41	SMJ	Spathian
34+3.1	-29.7695	-1.21252	-6.0007	28.557	28.284	2.34671	0.0241496	0.402664	0.531462	16.6942	20.8677	1.31986	82.8726	87.93	252.56	SMJ	Spathian
34+2.6	-28.9913	-1.49696	-6.64912	27.4943	28.0717	1.79142								87.43	252.06	SMJ	Spathian
34+2.1	-29.4173	-0.815791	-5.96641	28.6015	27.9884	1.1471								86.93	251.56	SMJ	Spathian
34+1.6	-28.489	-0.922698	-5.93772	27.5663	28.0008	1.21409	0.0249641	0.21806	0.259116	8.7365	10.9206	1.18828	84.9614	86.43	251.06	SMJ	Spathian
34+1.1	-28.8148	-1.09221	-5.58619	27.7226	27.9696	1.82911								85.93	250.56	SMJ	Spathian
34+0.6	-29.6578	-1.03847	-7.41493	28.6194	27.8255	2.14094								85.43	250.06	SMJ	Spathian
34+0.1	-29.4165	-2.07826	-6.14101	27.3382	28.106	2.13384								84.93	249.56	SMJ	Spathian
33+2.0	-29.5613	-1.68023	-6.22982	27.881	28.2963	1.79461	0.0409947	0.58202	0.555647	14.1811	17.7264	0.954688	73.8887	84.43	249.06	SMJ	Spathian
33+1.5	-30.4766	-1.50794	-5.94996	28.9686	28.389	1.39327								83.93	248.56	SMJ	Spathian
33+1.0	-30.2519	-1.57741	-6.50418	28.6745	28.5857	1.0711								83.43	248.06	SMJ	Spathian
33+0.5	-30.6122	-1.52951	-7.07748	29.0827	28.9033	1.27904	0.0160831	0.268683	0.578677	16.6937	20.8671	2.15376	84.2322	82.93	247.56	SMJ	Spathian
32-0.2	-30.3403	-2.01876	-6.49188	28.3216	28.9908	1.83701								82.23	246.86	SMJ	Spathian
32+4.4	-31.3816	-1.91251	-7.79929	29.4691	29.0699	1.12579								81.63	246.26	SMJ	Spathian
32+3.8	-31.3654	-1.95909	-6.11933	29.4063	28.7924	1.54827								81.03	245.66	SMJ	Spathian
32+3.5		-1.62154	-5.99995		28.9493									80.73	245.36	SMJ	Spathian
32+3.2	-30.4351	-2.46256	-7.61488	27.9725	28.8286	1.61919	0.0135852	0.224533	0.393971	16.5428	20.6785	1.75462	87.4211	80.43	245.06	SMJ	Spathian
32+2.85		-1.87015	-5.76894		28.7272									80.08	244.71	SMJ	Spathian
32+2.55	-30.7844	-1.67761	-8.00409	29.1068	28.7237	1.64756								79.78	244.41	SMJ	Spathian
32+2.2	-30.7516	-1.64949	-6.58742	29.1022	28.9741	1.04764								79.43	244.06	SMJ	Spathian
32+2.0	-30.4773	-1.7639	-5.91728	28.7134	28.9629	1.19683	0.0148111	0.21109	0.576988	14.2145	17.7681	2.73337	87.1208	79.23	243.86	SMJ	Spathian
32+1.8		-1.27807	-5.90968		29.0154									79.03	243.66	SMJ	Spathian
32+1.4	-29.8922	-0.963074	-6.07145	28.9292	29.0458	1.61007								78.63	243.26	SMJ	Spathian
32+1.2	-30.0855	-0.768431	-6.6078	29.317	29.2336	0.852273								78.43	243.06	SMJ	Spathian
32+1.0	-29.8924	-0.668719	-5.22993	29.2237	29.2469	1.65667								78.23	242.86	SMJ	Spathian
32+0.9	-30.3136	-0.849018	-5.32833	29.4646	29.3032	1.71341								78.13	242.76	SMJ	Spathian
32+0.7	-30.0751	-0.774806	-5.86055	29.3003	29.3402	1.5622								77.93	242.56	SMJ	Spathian
32+0.5	-30.1789	-0.968345	-7.14464	29.2106	29.4822	1.64958	0.0149548	0.21304	0.308672	14.2892	17.8615	1.44889	86.8818	77.73	242.36	SMJ	Spathian
31-0.1	-30.2685	-0.766424	-6.37123	29.502	29.63	1.53581								77.13	241.76	SMJ	Spathian
31+2	-30.5833	-0.649709	-6.53172	29.9336	29.6741	1.72253								76.58	241.21	SMJ	Spathian
31+1.5	-30.9565	-0.753229	-6.22627	30.2033	29.484	1.50876								76.08	240.71	SMJ	Spathian
31+1.0	-30.8284	-1.3075	-6.1476	29.5209	29.3647	1.14609	0.0375187	0.512671	0.518211	13.655	17.0687	1.01081	74.8197	75.58	240.21	SMJ	Spathian
31+0.5	-29.3424	-1.0824	-7.1084	28.26	29.2281	2.73238								75.08	239.71	SMJ	Spathian
30-0.1	-29.8057	-0.899945	-6.23545	28.9058	29.1666	1.98796								74.48	239.11	SMJ	Spathian
30+1.2	-29.5068	-0.256214	-5.64125	29.2506	29.2057	1.90016								73.93	238.56	SMJ	Spathian
30+0.45	-30.3017	-0.40595	-6.39696	29.8958	29.5243	1.41199	0.0101802	0.150363	0.152469	14.8416	18.552	1.01401	88.2986	73.18	237.81	SMJ	Spathian
29-0.1	-30.5007	-0.784211	-7.32389	29.7165	29.6873	0.688367								72.63	237.26	SMJ	Spathian
29+2.0	-29.8226	0.0300809	-9.23919	29.8527	29.7899	2.162								71.93	236.56	SMJ	Spathian
29+1.2	-30.1004	-0.379392	-6.80209	29.721	29.8558	1.86768								71.13	235.76	SMJ	Spathian
29+0.5	-29.8152	-0.0516503	-6.04277	29.7635	29.7283	1.67688								70.43	235.06	SMJ	Spathian
28-0.05	-30.3678	-0.142699	-6.75896	30.2251	29.5874	1.26686								69.88	234.51	SMJ	Spathian
28+1.4	-30.5061	-1.42686	-6.39466	29.0793	29.5872	1.01618	0.0118168	0.179277	0.294406	15.2519	19.0649	1.64218	83.1189	69.2	233.83	SMJ	Spathian
28+0.7	-30.4754	-1.32715	-6.22518	29.1482	29.7128	1.83397								68.5	233.13	SMJ	Spathian
28+0.25	-30.4494	-0.729529	-6.35072	29.7199	29.5239	0.682277								68.05	232.68	SMJ	Spathian
27-0.5	-30.9148	-0.523239	-6.08885	30.3916	29.7696	1.54291								67.3	231.93	SMJ	Spathian
27+3.5	-30.6774	-1.39684	-6.27469	29.2806	29.8143	1.41454	0.009752	0.140132	0.03816	14.3441	17.9301	0.272315	89.4	66.7	231.33	SMJ	Spathian
27+2.7	-30.7724	-0.464504	-7.03986	30.3079	29.87	1.93629								65.9	230.53	SMJ	Spathian
27+1.8	-30.0245	-0.652964	-6.21451	29.3715	29.4742	1.26889								65	229.63	SMJ	Spathian
27+0.95	-30.5346	-0.536096	-5.90973	29.9985	29.4919	2.36904	0.00755489	0.123049	0.150056	16.3495	20.4369	1.21948	91.3162	64.15	228.78	SMJ	Spathian
27+0.25	-30.0489	-1.63629	-6.37919	28.4126	29.4568	2.26453								63.45	228.08	SMJ	Spathian
26-0.25	-30.2241	-0.854991	-6.05698	29.3691	29.4731	1.13289								62.95	227.58	SMJ	Spathian
26+3	-30.6073	-0.475128	-5.90617	30.1321	29.5345	1.53784								62.3	226.93	SMJ	Spathian
26+1.7	-29.8847	-0.431323	-6.50508	29.4534	29.8027	1.7286								61	225.63	SMJ	Spathian
26+1.1	-30.6602	-0.35458	-8.00301	30.3056	29.9111	1.6576	0.0040733	0.0539344	0.0824474	13.2916	16.6145	1.52866	95.0924	60.4	225.03	SMJ	Spathian
26+0.5	-30.3491	-0.595853	-6.5788	29.7533	29.9105	1.96364								59.8	224.43	SMJ	Spathian
26+0.23		-0.45115	-6.66115		29.7995									59.53	224.16	SMJ	Spathian
25+0.2	-31.1679	-1.03814	-6.06749	30.1298	29.542	2.4783								59.1	223.73	SMJ	Spathian
24-0.15	-30.7704	-1.76103	-7.06254	29.0094	29.5716	1.05678	0.0143384	0.157557	0.229414	11.0043	13.7554	1.45607	83.5191	58.75	223.38	SMJ	Spathian
23-0.05	-30.8752	-1.59969	-6.38262	29.2756	29.5487	1.43533								58.45	223.08	SMJ	Spathian
23+1.4	-32.1853	-2.31364	-7.01789	29.8717	29.4724	0.970805								57.85	222.48	SMJ	Spathian
23+0.7	-31.1985	-1.7415	-7.5898	29.457	29.7862	1.29702	0.0090391	0.0980657	0.232629	10.8599	13.5749	2.37217	82.9451	57.15	221.78	SMJ	Spathian
23+0.2	-31.7876	-2.03934	-6.51344	29.7483	30.0459	1.68906								56.65	221.28	SMJ	Spathian
22+3.5	-31.964	-1.38544	-7.93857	30.5786	30.1328	1.45507								55.95	220.58	SMJ	Spathian
22+2.5	-32.4337	-1.85982	-7.68071	30.5738	30.1753	-0.164149								54.95	219.58	SMJ	Spathian
22+1.8	-32.4148	-2.10829	-6.87382	30.3065	30.1429	0.826393	0.0138832	0.158732	0.257765	11.4206	14.2758	1.62391	76.8613	54.25	218.88	SMJ	Spathian
22+0.7	-31.6982	-2.02884	-6.37913	29.6694	30.0295	1.26055								53.15	217.78	SMJ	Spathian
21-0.4	-31.4669	-1.88082	-7.8104	29.5861	29.8831	0.496551								52.05	216.68	SMJ	Spathian
21+2.45	-31.9344	-1.92282	-7.12336	30.0115	29.8359	1.48343	0.00602504	0.0745471	0.0756704	12.3073	15.3841	1.01507	89.7881	51.5	216.13	SMJ	Spathian
21+1.55	-31.3298	-1.48755	-6.45639	29.8422	30.0243	1.32438								50.6	215.23	SMJ	Spathian
21+0.35	-31.7248	-1.65437	-6.57946	30.0704	30.1218	1.22525								49.4	214.03	SMJ	Spathian
19-0.5	-31.4556	-0.844397	-6.90721	30.6112	29.5883	0.766514	0.0223197	0.212743	0.549799	9.5465	11.9331	2.58433	71.7472	48.25	212.88	SMJ	Spathian
19+0.9	-30.7306	-0.656901	-7.30974	30.0737	29.5829	1.5351								47.26	211.89	SMJ	Spathian
18-0.1	-29.9833	-2.51436	-5.87544	27.4689	29.7304	0.479297	0.0106078	0.0652647	0.0118663	6.1091	7.63637	0.181818	82.0208	46.26	210.89	SMJ	Spathian
18-0.5	-31.3257	-1.63531	-6.30607	29.6904	29.3468	1.51991								45.86	210.49	SMJ	Spathian
18-1.0	-30.3515	-0.990003	-6.18696	29.3615	29.4611	0.987762								45.36	209.99	SMJ	Spathian
18+0.6	-31.6646	-1.5254	-6.18453	30.1392	29.7873	1.24434	0.0245127	0.244498	0.496538	9.9281	12.4101	2.03085	68.5735	44.41	209.04	SMJ	Spathian
17+2.35	-30.3012	-0.343209	-6.12629	29.958	29.8466	1.86335								44.66	209.29	SMJ	Spathian
17+1.8	-29.9489	-0.506438	-7.84397	29.4425	29.6733	1.92008	0.00666155	0.0445999	0.0104797	6.6665	8.33313	0.234973	91.8762	44.11	208.74	SMJ	Spathian
17+0.7	-30.1346	-0.515101	-6.36314	29.6195	29.5057	1.29629								43.01	207.64	SMJ	Spathian
17+0.4	-30.6118	-1.50896	-6.21284	29.1028	29.8356	1.61599								42.71	207.34	SMJ	Spathian
17+0.1	-31.0617	-1.20345	-7.07532	29.8582	29.6714	1.21104								42.41	207.04	SMJ	Spathian
15-0.1	-31.3397	-0.577947	-6.52147	30.7618	29.5798	1.63743	0.0205844	0.197164	0.514859	9.5278	11.9097	2.61132	75.1995	39.78	204.41	SMJ	Spathian
15+0.4	-29.5581	-0.543381	-6.50287	29.0148	29.7821	1.92515								39.38	204.01	SMJ	Spathian
15+0	-29.9076	-0.74624	-6.64588	29.1614	29.8867	2.65053								38.98	203.61	SMJ	Spathian
13-0.4	-31.1745	-1.06031	-6.73017	30.1142	29.7712	1.45259								38.48	203.11	SMJ	Spathian
11-0	-31.5536	-1.17235	-6.51484	30.3813	28.866	1.34704	0.0189321	0.178382	0.366231	9.3871	11.7339	2.05307	78.9643	37.23	201.86	SMJ	Spathian
11+0.35	-30.5964	-0.412248	-7.0644	30.1841	28.508	-1.83975								36.23	200.86	SMJ	Spathian
10+0.25	-27.1698	-2.68095	-7.71152	24.4889	28.2662	0.514819								35.58	200.21	SMJ	Spathian
09-0	-29.1951	-1.82375	-7.12458	27.3713	27.9952	2.28582								35.33	199.96	SMJ	Spathian
09+0.5	-29.3761	-0.470768	-6.35066	28.9054	27.1747	1.05779	0.014039	0.127608	0.0207442	9.0466	11.3082	0.162562	79.0462	34.78	199.41	SMJ	Spathian
08-0.2	-30.3957	-1.36921	-6.6158	29.0265	27.946	1.08621								34.08	198.71	SMJ	Spathian
08+1.2	-26.668	-0.586439	-6.97816	26.0816	27.7564	1.07606								33.48	198.11	SMJ	Spathian	upper NLH
08+0.35	-29.5019	-1.15682	-6.29728	28.3451	27.2342	-0.066609	0.00983684	0.0687394	0.0444436	6.9564	8.6955	0.646552	88.1484	32.63	197.26	SMJ	Spathian	middle NLH
07-0.9	-27.4985	-1.07509	-6.19707	26.4234	26.6741	2.18534								31.38	196.01	SMJ	Spathian
07-0.2	-26.9517	-0.657115	-5.98952	26.2946	26.9336	1.3785								32.08	196.71	SMJ	Spathian
07+1.1	-27.216	-0.99033	-6.66083	26.2257	27.0775	1.45405	0.0208405	0.0377734	0.00885722	1.8252	2.2815	0.234483	73.9494	30.43	195.06	SMJ	Spathian
07+0.22	-29.4671	-2.08775	-5.95992	27.3793	27.4753	2.10446	0.0153944	0.116558	0.0123156	7.53	9.4125	0.10566	78.0079	29.55	194.18	SMJ	Spathian
06-0.1	-30.2629	-1.19824	-6.40365	29.0647	26.9112	1.01415	0.0144272	0.137886	0.0773391	9.4869	11.8586	0.560892	76.3489	29.23	193.86	SMJ	Spathian
06+0	-30.3492	-1.93686	-6.15849	28.4124	26.4399	0.989792								28.96	193.59	SMJ	Spathian
05+0.3	-25.031	-1.55719	-6.56263	23.4738	25.9398	1.56017	0.0296296	0.0664112	1.17752	2.252	2.815	17.7308	48.9145	28.79	193.42	SMJ	Spathian
04+0.1	-24.6154	-0.746077	-6.59498	23.8693	24.6093	1.73266								27.29	191.92	SMJ	Spathian
03+0.1	-25.2185	-0.339582	-6.21851	24.879	24.1316	2.27973	0.0239124	0.05041	0.0814315	2.0993	2.62412	1.61538	67.6859	26.89	191.52	SMJ	Spathian
02+0.2	-23.6732	-1.2614	-6.69739	22.4118	24.3011	3.11554								26.49	191.12	SMJ	Spathian
601-0.1	-24.6871	-0.433412	-6.56752	24.2537	24.8379	0.583832	0.0451458	0.0697251	0.10534	1.5369	1.92112	1.51079	49.838	26.19	190.82	SMJ	Spathian
601-0.3	-26.1057	-0.0139571	-6.17555	26.0917	24.2204	1.67992								25.99	190.62	SMJ	Spathian
601-0.9	-24.298	-0.355765	-6.38343	23.9422	24.3157	2.13891	0.018178	0.0345887	0.0676627	1.9041	2.38013	1.9562	74.7527	25.39	190.02	SMJ	Spathian
600+0.5	-25.0807	-0.678152	-6.32351	24.4025	25.6308	2.6718								25.49	190.12	SMJ	Spathian
600+0.25	-25.4217	-0.506481	-6.02065	24.9152	25.8168	1.96364	0.0124464	0.0202518	0.258633	1.6267	2.03337	12.7708	78.9043	25.24	189.87	SMJ	Spathian
599+10	-28.5288	0.273253	-6.36337	28.8021	27.2207	1.89171								24.54	189.17	SMJ	Spathian
598+20	-27.8239	0.486414	-7.24527	28.3103	28.3222	1.12883	0.0121779	0.0169924	0.184367	1.3897	1.73712	10.85	85.8397	23.34	187.97	SMJ	Spathian
596+2	-28.7557	0.917965	-6.16572	29.6736	28.2564	1.47187								21.77	186.4	SMJ	Spathian
596+0.9	-28.9822	0.927773	-6.22833	29.91	28.3767	1.23016								20.67	185.3	SMJ	Spathian
595-0.5	-23.8607	0.725401	-6.129	24.5862	28.522	1.66572								19.27	183.9	SMJ	Spathian
592+4.6	-27.1951	2.20853	-6.23755	29.4036	28.4346	2.74373	0.00773013	0.0289622	0.00927616	3.7614	4.70175	0.320285	89.6932	18.08	182.71	SMJ	Spathian
591+3.4	-27.6931	1.34363	-7.02849	29.0367	28.3678	1.51957								16.88	181.51	SMJ	Spathian
591+2.2	-28.2126	1.02422	-6.57939	29.2368	29.4376	1.60602								15.68	180.31	SMJ	Spathian
591+1	-28.2993	1.27661	-6.24531	29.576	29.573	1.98492								14.48	179.11	SMJ	Spathian
589+0.05	-29.2611	0.674073	-7.13785	29.9352	29.1501	1.19886	0.00666262	0.0837587	0.0490707	12.5505	15.6881	0.585859	89.4244	13.08	177.71	SMJ	Spathian
587+90	-28.8857	1.19471	-11.3807	30.0804	29.39	2.37294								12.33	176.96	SMJ	Spathian
586+30	-26.0546	0.867617	-9.09343	26.9222	29.3578	3.38908								10.98	175.61	SMJ	Spathian
585+5.1	-29.1925	1.24394	-8.91221	30.4364	29.3459	1.82708								9.78	174.41	SMJ	Spathian
585+3.9	-28.4718	0.943164	-10.0892	29.415	29.2245	0.968779								8.58	173.21	SMJ	Spathian
585+2.45	-28.8395	1.03587	-7.92121	29.8754	29.6264	0.2002								7.08	171.71	SMJ	Spathian
585+1.25	-28.8472	0.626504	-9.9286	29.4737	29.3108	0.407239								5.88	170.51	SMJ	Spathian
585+0.4	-27.8829	1.04845	-9.48163	28.9313	28.496	0.668069								5.08	169.71	SMJ	Spathian
583-0.1	-28.1697	0.688785	-6.85046	28.8585	28.2081	1.4885	0.00364726	0.0240158	0.087478	6.5735	8.21687	3.64252	94.3888	3.48	168.11	SMJ	Spathian
582-0.25	-24.7491	0.592042	-6.47661	25.3411	27.343	3.22866								2.33	166.96	SMJ	Spathian
581-0.5	-27.6078	0.828105	-6.31031	28.4359	26.6459	2.64306								1.43	166.06	SMJ	Spathian
580-0.2	-24.5342	0.614081	-6.47078	25.1483	26.0927	2.42283								1	165.63	SMJ	Spathian
580-1.2	-24.5502	0.895243	-8.65548	25.4455	26.3432	3.07135	0.00789076	0.0138088	0.0182922	1.7402	2.17525	1.32468	82.0664	0	164.63	SMJ	Spathian
																		upper NLH
NMJ-35+4.5		-0.972354	-6.55846		28.2448									100.12	195.13	North Majiashan	Spathian	middle NLH
NMJ-35+2.5	-30.1174	-1.34745	-8.37423	28.77	28.8648	2.44032	0.050479	0.327201	1.03695	6.4689	8.08612	3.16914	39.1819	98.12	193.13	NMJ	Spathian
NMJ-33+0.6	-28.9567	-1.23713	-9.08145	27.7196	28.109	2.93346	0.0728277	0.643165	0.694056	8.8555	11.0694	1.07913	12.2558	85.75	180.76	NMJ	Spathian
NMJ-32+3	-29.1975	0.907476	-6.21044	30.1049	28.345	3.94735	0.001773	0.0151555	0.00937502	8.4914	10.6143	0.61859	97.5712	80.74	175.75	NMJ	Spathian
NMJ-31+6.8	-25.1559	0.685767	-6.20469	25.8416	28.0954	3.78672	0.0185475	0.0238027	0.287487	1.2994	1.62425	12.0779	69.0875	76.14	171.15	NMJ	Spathian
NMJ-31+1	-28.6968	0.591951	-6.01658	29.2887	27.633	3.94735	0.00291163	0.0116465	0.0608975	4.0167	5.02088	5.22881	95.065	70.34	165.35	NMJ	Spathian
NMJ-30+6.2	-27.1473	0.3749	-5.33208	27.5222	26.9649		0.0246696	0.0246696	0.0791129	1.0019	1.25238	3.2069	57.4662	65.54	160.55	NMJ	Spathian
NMJ-30+2.7	-24.1579	1.24948	-4.38301	25.4074	28.1044	2.97479	0.0342046	0.0402731	3.69299	1.188	1.485	91.6986	44.8313	62.04	157.05	NMJ	Spathian
NMJ-30+0.2	-24.1737	2.59101	-4.00335	26.7647	27.6025	3.44531	0.0241696	0.0323501	0.684557	1.3245	1.65563	21.1609	62.816	59.54	154.55	NMJ	Spathian	middle
NMJ-29+1.5	-28.6651	2.87369	-6.20995	31.5388	28.6438	3.03234	0.00365114	0.0376118	0.0915786	10.3366	12.9208	2.43484	94.9984	58.66	153.67	NMJ	Spathian	lower
NMJ-28+8.8	-24.2393	2.54035	-7.44644	26.7796	29.584	3.04345	0.0336907	0.0485145	0.549382	1.4368	1.796	11.3241	55.0791	54.36	149.37	NMJ	Spathian
NMJ-28+2.3	-28.6143	4.11397	-5.98055	32.7282	30.5018		0.00242511	0.040087	0.0749358	16.594	20.7425	1.86933	97.5749	47.86	142.87	NMJ	Spathian
NMJ-27+2.3	-26.2635	3.84511	-5.43339	30.1086	29.7204	2.77083	0.0135206	0.0207854	0.378376	1.5394	1.92425	18.2039	79.82	43.56	138.57	NMJ	Spathian
NMJ-25+3	-27.9757	3.37823	-6.24224	31.3539	29.1018		0.00152377	0.0222586	0.0103771	14.6071	18.2589	0.466205	98.0712	38.92	133.93	NMJ	Spathian
NMJ-24+0.4	-25.4045	2.22719	-6.81319	27.6317	27.719	2.48609	0.022575	0.0283713	0.816971	1.253	1.56625	28.7957	69.4932	35.45	130.46	NMJ	Spathian
NMJ-23+0	-23.6866			23.6866	27.0124	2.52244	0.0653692	0.100445	0.505415	1.5393	1.92412	5.03175	20.2815	31.23	126.24	NMJ	Spathian
NMJ-21-0.1	-25.3616	0.452862	-6.84507	25.8144	25.958	2.84656	0.0241559	0.041955	0.433853	1.7323	2.16538	10.3409	68.2159	26.51	121.52	NMJ	Spathian
NMJ-20-0.1	-25.6192	0.956264	-7.32393	26.5755	26.2324	2.73044	0.0643582	0.188307	0.768326	2.9145	3.64312	4.08017	20.5454	23.8	118.81	NMJ	Spathian
NMJ-19+0	-25.3152	0.766671	-7.90815	26.0819	26.7468	2.40734	0.0808846	0.140026	1.09238	1.729	2.16125	7.80124	13.0273	21.77	116.78	NMJ	Spathian
NMJ-18+1.4	-25.6961	3.30771	-6.28383	29.0038	27.4226	1.91587	0.0674475	0.174893	1.21092	2.5976	3.247	6.92377	21.5727	19.08	114.09	NMJ	Spathian
NMJ-17+0.6	-23.9217	2.3367	-7.52849	26.2584	27.8345	1.86012	0.0565518	0.11445	0.642267	2.0208	2.526	5.61176	32.6764	15.56	110.57	NMJ	Spathian
NMJ-16+2.2	-25.2553	3.9381	-7.33235	29.1934	28.2425	2.17132	0.0339516	0.0443027	0.688969	1.3013	1.62662	15.5514	58.5956	14.78	109.79	NMJ	Spathian
NMJ-13-0.1	-24.5761	4.05872	-5.75641	28.6348	28.1979	1.52864	0.0324278	0.0426681	0.549566	1.3178	1.64725	12.88	65.8655	7.82	102.83	NMJ	Spathian
NMJ-11+1.8	-28.3385	-0.216598	-8.70009	28.1219	28.6828	1.53472	0.0616642	1.02658	0.781901	16.7032	20.879	0.761653	50.6687	3.16	98.17	NMJ	Spathian
NMJ-10+1	-26.407	2.37396	-7.8787	28.781	28.5126	1.7405	0.0536022	0.219563	0.0309243	4.0793	5.09912	0.140845	48.4594	1	96.01	NMJ	Spathian	NLH base 2
PDS-58-0.1	-23.9891	1.39592	-9.12563	25.385	28.3186	2.42248	0.0716007	0.151157	0.770105	2.1131	2.64138	5.09474	20.4437	111.72	111.72	West Pingdingshan	Spathian
PDS-57+2.4	-27.0799	4.24881	-6.34662	31.3287	28.7924		0.00108484	0.015108	0.00870268	13.9289	17.4111	0.57603	99.2023	105.51	105.51	WPDS	Spathian
PDS-56+0.1	-24.5216	3.7204	-6.2827	28.242	27.8237	1.86513	0.0128111	0.0162483	0.296687	1.2737	1.59213	18.2596	84.3767	100.39	100.39	WPDS	Spathian
PDS-54+2	-25.3194	4.89457	-6.34672	30.214	28.5653	2.07908	0.004864	0.076032	0.042752	15.6834	19.6043	0.56229	95.7333	97.01	97.01	WPDS	Spathian	NLH base 1
PDS-53+0.5	-24.1497	-0.200907	-8.11287	23.9488	28.2412	1.1191	0.0654581	0.118448	1.0107	1.7951	2.24388	8.53289	22.0737	94.92	94.92	WPDS	Spathian
PDS-53+0.1	-27.9114	1.1814	-8.43863	29.0927	28.5469	1.65535	0.0647231	0.441365	0.725211	6.7929	8.49113	1.64311	22.0203	94.52	94.52	WPDS	Spathian
PDS-52+1.1	-28.9691	0.739448	-9.77167	29.7086	28.5372	1.60568	0.0893526	1.24854	1.07303	13.9177	17.3971	0.859425	20.2209	94.44	94.44	WPDS	Spathian
PDS-52+0.6	-29.0453	0.724901	-10.5172	29.7702	29.8133	0.848446	0.0814012	0.962014	2.27512	11.7934	14.7417	2.36496	17.7766	93.94	93.94	WPDS	Smithian
PDS-52+0.2	-29.6915	0.47418	-9.77491	30.1657	29.6585	1.93491	0.0973752	0.957248	1.47466	9.8439	12.3049	1.54052	17.4786	93.54	93.54	WPDS	Smithian
PDS-51+0.5	-29.9866	0.342557	-8.89366	30.3291	29.4881	1.43768	0.110559	1.6345	2.07232	14.7811	18.4764	1.26786	11.5528	92.37	92.37	WPDS	Smithian
PDS-51+0.25	-29.8803	-1.56139	-8.19295	28.3189	28.2067	1.52055	0.0623057	0.623057	1.18269	10.0092	12.5115	1.8982	43.8687	92.12	92.12	WPDS	Smithian
PDS-50+0.4	-30.1129	-1.25636	-8.77153	28.8565	28.1492	1.98402	0.0905491	0.760437	0.953843	8.3626	10.4533	1.25434	12.0882	91.59	91.59	WPDS	Smithian
PDS-49+0.5	-25.8605	-2.49726	-7.53657	23.3632	26.9757	2.55593	0.0617873	0.101302	0.0553212	1.645	2.05625	0.546099	28.1543	90.41	90.41	WPDS	Smithian
PDS-48+0.2	-31.7029	-1.82486	-7.2605	29.878	26.0712	1.20646	0.042011	0.376435	0.992042	8.9183	11.1479	2.63536	58.4049	88.93	88.93	WPDS	Smithian
PDS-47+0.6	-27.2088	-2.74684	-6.51205	24.462	25.4807	3.10738	0.00407182	0.0119893	0.00299731	2.9526	3.69075	0.25	94.3447	88.15	88.15	WPDS	Smithian
PDS-45+0.6	-26.3349	-2.53877	-7.27895	23.7962	25.8411	2.43111	0.0258817	0.0261862	0.0100482	1.0083	1.26038	0.383721	69.551	85.61	85.61	WPDS	Smithian
PDS-44+1.2	-28.6195	-2.71513	-7.30047	25.9044	24.852	2.23979	0.047261	0.0557182	0.0716377	1.1735	1.46687	1.28571	50.2516	83.91	83.91	WPDS	Smithian
PDS-43-0.3	-27.7837	-2.6187	-7.25402	25.165	25.4582	1.13075	0.0181054	0.0253475	0.00637999	1.3997	1.74962	0.251701	82.7568	82.41	82.41	WPDS	Smithian
PDS-42+1.5	-27.7266	-2.79403	-7.39285	24.9326	25.5821	1.05606	0.0266189	0.0275162	0.00807539	1.0267	1.28337	0.293478	70.0911	81.25	81.25	WPDS	Smithian
PDS-41+0.2	-30.1277	-2.63488	-8.23211	27.4928	25.5015	0.977532	0.0886474	0.362116	0.0869748	4.0866	5.10825	0.240185	16.3704	78.71	78.71	WPDS	Smithian
PDS-40+0.5	-28.8869	-4.47116	-9.92126	24.4157	25.3804	1.10358	0.0812713	0.209104	0.0474083	2.5606	3.20075	0.226721	15.3424	76.92	76.92	WPDS	Smithian
PDS-38+0.3	-26.6805					1.67288	0.0855031	0.134866	0.0255628	1.5855	1.98187	0.189542	11.8525	75.1	75.1	WPDS	Smithian
PDS-37-0.1	-28.0214	-3.34091	-8.18212	24.6805	24.5481	1.23377	0.0858746	0.194112	0.0178905	2.2645	2.83062	0.0921659	10.5473	74.7	74.7	WPDS	Smithian
PDS-37+0.4	-29.9803					1.22343	0.0964085	0.341893	0.0258875	3.5419	4.42737	0.075718	10.7329	72.82	72.82	WPDS	Smithian
PDS-36+0.1	-29.7428					1.06432	0.0868907	0.266879	0.0195061	3.0599	3.82487	0.0730897	11.336	70.9	70.9	WPDS	Smithian
PDS-35+0.2	-29.1447					1.32469	0.0954056	0.265318	0.0236242	2.7781	3.47262	0.0890411	9.13751	69.29	69.29	WPDS	Smithian
PDS-34+1.5	-29.9203	-4.08686	-9.31189	25.8334	27.6263	1.24228	0.0923493	0.279712	0.0204234	3.0212	3.7765	0.0730159	11.2026	67.74	67.74	WPDS	Smithian
PDS-33-0.3	-29.0169	2.78003	-8.013	31.7969	27.6263	1.62983	0.0909648	0.200476	0.0220788	2.209	2.76125	0.110132	11.6847	65.94	65.94	WPDS	Smithian
PDS-33+0.6	-29.4505	-4.20197	-9.19579	25.2486	27.165	1.14463	0.0980594	0.239406	0.0176684	2.4355	3.04438	0.0738007	11.6582	64.08	64.08	WPDS	Smithian
PDS-32+1.5	-28.6979					1.53727	0.091313	0.220226	0.0152188	2.4013	3.00162	0.0691057	10.4774	62.79	62.79	WPDS	Smithian
PDS-31-0.3	-28.7252	-2.94423	-8.14215	25.781	25.1183	1.20363	0.0920082	0.204171	0.0166491	2.222	2.7775	0.0815451	12.3732	60.99	60.99	WPDS	Smithian
PDS-31+2.3	-27.3979					1.51794	0.0910092	0.162195	0.0189227	1.785	2.23125	0.116667	9.89185	60.07	60.07	WPDS	Smithian
PDS-31+0.5	-27.8447	-3.51923	-8.17484	24.3255	24.9884	0.980861	0.090529	0.152333	0.0121866	1.6868	2.1085	0.08	12.9528	58.27	58.27	WPDS	Smithian
PDS-30+0.5	-25.9614	-2.9111	-7.76912	23.0503	24.673	1.03884	0.0722581	0.0890453	0.0109482	1.2361	1.54513	0.122951	27.0121	55.7	55.7	WPDS	Smithian
PDS-30+0.1	-29.5336	-2.7367	-8.29894	26.7969	24.3549	0.440728	0.0898159	0.238449	0.0135121	2.648	3.31	0.0566667	20.5169	55.3	55.3	WPDS	Smithian
PDS-29-0.5	-28.3134	-3.79418	-8.25784	24.5192	24.8658	0.536344	0.0846633	0.173175	0.011545	2.0393	2.54913	0.0666667	3.79173	54.7	54.7	WPDS	Smithian
PDS-29+0	-25.4021	-2.3197	-7.98021	23.0824	25.1434	0.734698	0.0681036	0.0630117	0.00763778	0.929	1.16125	0.121212	36.3518	52.73	52.73	WPDS	Smithian
PDS-27-0.1	-27.8884	-1.00809	-7.32558	26.8803	24.6705	0.520069	0.0663439	0.189203	0.00921443	2.8662	3.58275	0.0487013	38.5704	50.16	50.16	WPDS	Smithian
PDS-27-0.7	-26.3726	-1.93431	-7.39825	24.4383	24.8772	1.53795	0.0700501	0.0700501	0.00972917	1.002	1.2525	0.138889	35.1388	49.56	49.56	WPDS	Smithian
PDS-27+0.9	-25.0755	-0.642958	-7.42576	24.4325	25.3259	1.82339	0.0738873	0.0483109	0.0120777	0.6567	0.820875	0.25	28.9545	47.92	47.92	WPDS	Smithian
PDS-26-0.5	-26.252	-0.699717	-7.78951	25.5523	25.1722	1.7794	0.0830662	0.166132	0.0166132	2.0067	2.50838	0.1	24.4853	46.52	46.52	WPDS	Smithian
PDS-26+2.3		1.12391	-6.84379											45.99	45.99	WPDS	Smithian
PDS-26+1.5	-26.0849	0.180748	-8.29376	26.2656	26.4556	1.53488	0.104729	0.173971	0.0302935	1.6564	2.0705	0.174129	13.4471	45.19	45.19	WPDS	Smithian
PDS-26+0.4	-25.7244	1.462	-6.8692	27.1864	26.7567	1.78451	0.0107742	0.0276856	0.024276	2.5738	3.21725	0.876847	86.3618	44.09	44.09	WPDS	Smithian
PDS-25+2	-25.7167	1.10145	-6.63704	26.8182	26.7567	1.80293	0.0145783	0.028983	0.102568	1.9945	2.49313	3.53892	82.6449	43.29	43.29	WPDS	Smithian
PDS-25+1.65	-26.4126					2.0229	0.0233918	0.0483226	0.0116959	2.0589	2.57362	0.242038	69.2213	42.94	42.94	WPDS	Smithian
PDS-25+1	-26.5038					1.13485	0.132009	1.13471	0.028087	8.5691	10.7114	0.0247525	6.37668	42.29	42.29	WPDS	Smithian
PDS-25+0.4	-26.8674					1.319	0.102568	0.44896	0.028791	4.3901	5.48763	0.0641283	10.0281	41.69	41.69	WPDS	Smithian
PDS-25+0.1	-25.8718	-3.00722	-7.60103	22.8646	25.8208	1.62798	0.105761	0.106697	0.0355656	1.0041	1.25513	0.333333	6.40638	41.39	41.39	WPDS	Smithian
PDS-24-0.1	-27.245	1.53196	-6.48225	28.777	26.001		0.0114643	0.0470483	0.205762	4.1143	5.14288	4.37342	85.1113	41.19	41.19	WPDS	Smithian
PDS-24+1.4		1.46949	-6.83538											41.07	41.07	WPDS	Smithian
PDS-24+1	-26.2454						0.0984507	0.251187	0.0266829	2.5418	3.17725	0.106227	7.98998	40.67	40.67	WPDS	Dienerian
PDS-24+0.3	-26.5131	0.17621	-6.88781	26.6893	26.9263		0.0310657	0.0760792	0.0126799	2.4504	3.063	0.166667	68.3003	39.97	39.97	WPDS	Dienerian
PDS-23+1.8	-25.9319	-0.61914	-8.19262	25.3128	26.001		0.0853481	0.0892994	0.0221273	1.0479	1.30988	0.247788	20.9739	39.34	39.34	WPDS	Dienerian
PDS-23+0.7		0.539832	-6.75301											38.24	38.24	WPDS	Dienerian
PDS-23+0.5	-25.7298						0.119131	0.103903	0.0250801	0.8743	1.09288	0.241379	10.4281	38.04	38.04	WPDS	Dienerian
PDS-23+0.4		0.907038	-6.78003											37.94	37.94	WPDS	Dienerian
PDS-22-0.4	-25.3912	-0.80689	-7.0757	24.5843	21.2305	1.353	0.0944394	0.0667986	0.0214984	0.7066	0.88325	0.321839	23.22	37.14	37.14	WPDS	Dienerian
PDS-22+0.5	-25.4327	-8.82876	-8.85236	16.6039	21.2305		0.0945221	0.121024	0.022968	1.2872	1.609	0.189781	11.6616	35.48	35.48	WPDS	Dienerian
PDS-21+1	-25.6501	-3.14672	-10.0456	22.5034	21.9413		0.102705	0.116339	0.0236313	1.1289	1.41112	0.203125	9.11044	34.02	34.02	WPDS	Dienerian
PDS-20-0.4	-25.7025					1.1	0.10394	0.109225	0.0220211	1.048	1.31	0.201613	11.9156	32.62	32.62	WPDS	Dienerian
PDS-20+0.6	-26.4596	-2.3859	-8.31473	24.0737	23.5555		0.0914501	0.218073	0.0219832	2.3884	2.9855	0.100806	12.0672	31.75	31.75	WPDS	Dienerian
PDS-19+1	-25.7582	-1.28577	-7.87178	24.4725	24.0626		0.0933934	0.070045	0.0200129	0.7537	0.942125	0.285714	16.6131	29.09	29.09	WPDS	Dienerian
PDS-18-0.1	-25.8019	-2.62943	-10.2806	23.1725	24.5927	0.928	0.118815	0.0821079	0.0260813	0.6935	0.866875	0.317647	3.40246	27.99	27.99	WPDS	Griesbach
PDS-18-1.2	-26.1395	-1.60792	-7.43806	24.5316	24.5475		0.0841698	0.096505	0.0239449	1.1457	1.43212	0.24812	27.4398	26.89	26.89	WPDS	Griesbach
PDS-17+2.5	-27.5847	-0.871449	-7.82291	26.7133	24.2873		0.0951554	0.19191	0.0527753	2.0177	2.52212	0.275	20.0375	22.83	22.83	WPDS	Griesbach
PDS-17+1.5	-26.4322	-2.58464	-8.81983	23.8476	24.4992	1.128	0.106893	0.155885	0.0204878	1.4517	1.81462	0.131429	10.9228	20.83	20.83	WPDS	Griesbach
PDS-17+0.5	-25.2721	-2.10037	-7.44688	23.1718	24.7018		0.112367	0.103003	0.0224734	0.9132	1.1415	0.218182	6.36073	20.33	20.33	WPDS	Griesbach
PDS-16-0.5	-25.5922	-1.36047	-7.5172	24.2317	23.7322		0.105569	0.063014	0.0163673	0.5934	0.74175	0.25974	18.1636	19.83	19.83	WPDS	Griesbach
PDS-16+0.4	-26.3438	-0.799208	-7.69441	25.5446	23.7034	0.944	0.103543	0.155735	0.0185199	1.5007	1.87587	0.118919	15.8187	18.6	18.6	WPDS	Griesbach
PDS-15+0.6	-25.1126	-3.24707	-9.01614	21.8656	23.4147		0.117537	0.0605494	0.0186991	0.5196	0.6495	0.308824	10.9567	17.81	17.81	WPDS	Griesbach
PDS-14-0.4	-25.8489						0.0932405	0.058	0.012481	0.6232	0.779	0.21519	26.5823	16.81	16.81	WPDS	Griesbach
PDS-14+0.3	-25.3246	-3.30754	-7.81061	22.017	22.7991	0.795	0.108551	0.0679545	0.0123554	0.625	0.78125	0.181818	11.7473	15.2	15.2	WPDS	Griesbach
PDS-13+0.8	-25.0525	-1.81892	-7.36453	23.2336	23.0595		0.120347	0.0723829	0.0113371	0.5985	0.748125	0.156627	12.7917	14.19	14.19	WPDS	Griesbach
PDS-12+2	-25.5507	-1.47046	-7.87553	24.0802	23.0595		0.125272	0.112085	0.0122446	0.8942	1.11775	0.109244	5.81075	13.42	13.42	WPDS	Griesbach
PDS-12+0.9	-25.3726	-2.46567	-8.51797	22.9069	23.4069	1.039	0.118479	0.0588005	0.0105314	0.4929	0.616125	0.179104	12.2381	12.32	12.32	WPDS	Griesbach
PDS-11-0.4							0.101473	0.0595107	0.0091555	0.5847	0.730875	0.153846	23.7042	11.02	11.02	WPDS	Griesbach
PDS-11-1.4														10.02	10.02	WPDS	Griesbach
PDS-11-2.4							0.103266	0.0809174	0.0100183	0.7854	0.98175	0.12381	22.9358	9.02	9.02	WPDS	Griesbach
PDS-11-3														8.42	8.42	WPDS	Griesbach
PDS-11-3.5						0.67	0.0780245	0.0729906	0.0119554	0.9357	1.16962	0.163793	37.0771	7.92	7.92	WPDS	Griesbach
PDS-11-4														7.42	7.42	WPDS	Griesbach
PDS-11-4.9							0.118029	0.0968892	0.0158546	0.8219	1.02737	0.163636	11.9189	6.52	6.52	WPDS	Griesbach
PDS-11-7.5							0.120332	0.0867509	0.0242529	0.7162	0.89525	0.27957	6.7195	3.92	3.92	WPDS	Griesbach
PDS-11-10						1.036	0.129489	0.157236	0.0379217	1.2204	1.5255	0.241176	7.50799	1.42	1.42	WPDS	Griesbach
PTB+10.1	-24.5795	-4.99696	-7.62446	19.5825		1.51									10.1	West Majiashan	Griesbach
PTB+9.1	-25.721	-5.55364	-8.8421	20.1673											9.1	WMJS	Griesbach
PTB+6	-25.4192														6	WMJS	Griesbach
PTB+2.7	-24.9287	-5.31992	-7.36099	19.6088		1.463									2.7	WMJS	Griesbach
PTB+1.7	-26.1821	-4.94939	-7.08393	21.2327											1.7	WMJS	Griesbach
PTB+1	-27.0128	-3.36449	-4.83234	23.6483											1	WMJS	Griesbach
PTB+0.2	-26.6997	-3.33017	-3.722	23.3695		1.35									0.2	WMJS	Griesbach
PTB-0	-26.6398														0	WMJS	Wujiaping
PTB-0.4	-26.8119														-0.4	WMJS	Wujiaping
PTB-0.7	-25.9662					1.778									-0.7	WMJS	Wujiaping
PTB-1.4	-25.4192														-1.4	WMJS	Wujiaping
PTB-2.2	-25.8735														-2.2	WMJS	Wujiaping
	-28.2287	-0.744823		27.5819		1.61539		0.184516			0.616125		34.4903
	2.29743	1.84052		2.69217		0.743119					20.879
						3.94735					6.4666		81.4354
											6.45944
		-2.02193		28.5595		1.50989
		-1.14445		1.85071		0.635175					1.22077
		4.89457									2.59996
	-32.4337
											6.4666
											6.45944

## Sheet: Spiti-N
Spiti River Valley samples
Source: Leo Krystyn
Sample	elev (m)	d15N	series
AL2-113	16.0184	3.03133	Spathian
AL2-112	15.8466	2.40533	Spathian
AL2-111	15.7216	2.80933	Spathian
AL2-110	15.4325	2.13733	Spathian
AL2-109	15.1747	3.96833	Spathian
AL2-108	15.0262	2.68033	Spathian
AL2-107	14.9637	2.91233	Smithian
AL2-106	14.7528	2.80933	Smithian
AL2-104	14.3387	1.5285	Smithian
AL2-102	13.9637	0.6615	Smithian
AL2-100	13.5653	2.6685	Smithian
AL2-099	13.495	1.9825	Smithian
AL2-098	13.1981	2.4745	Smithian
AL2-097	13.0887	3.1775	Smithian
AL2-096	12.9169	2.6905	Smithian
AL2-092	12.4403	2.9665	Smithian
AL2-090	12.2762	3.3305	Smithian
AL2-089	12.0028	2.0825	Smithian
AL2-088	11.7684	2.9495	Smithian
AL2-087	11.5497	3.2335	Smithian
AL2-086	11.4872	1.9695	Smithian
AL2-085	11.2997	2.9775	Smithian
AL2-084	11.2059	2.4595	Smithian
AL2-083	10.8387	3.3875	Smithian
AL2-082	10.7294	1.3875	Smithian
AL2-081	10.4872	3.1515	Smithian
AL2-79	10.2528	4.3155	Smithian
AL2-77	9.96375	1.8205	Smithian
AL2-76	9.79187	1.6325	Smithian
AL2-75	9.50281	3.4335	Smithian
AL2-74	9.41687	2.5885	Smithian
AL2-73	9.26062	3.3795	Smithian
AL2-72	9.15906	3.0625	Smithian
AL2-71	8.96375	3.2335	Smithian
AL2-70	8.87	2.2835	Smithian
AL2-69	8.83094	2.6475	Smithian
AL2-68	8.64344	2.4615	Smithian
AL2-67	8.52082	3.5495	Smithian
AL2-66	8.37172	2.5495	Smithian
AL2-65	8.15578	3.6425	Smithian
AL2-64	8.04267	3.2315	Smithian
AL2-63	7.94242	2.2405	Smithian
AL2-62	7.83959	2.8085	Smithian
AL2-61	7.75733	2.1425	Smithian
AL2-60	7.69306	3.67033	Smithian
AL2-59	7.59794	2.63567	Smithian
AL2-58	7.32288	2.99967	Smithian
AL2-57	7.14807	2.14167	Smithian
AL2-56	7.01954	3.29967	Smithian
AL2-55	6.85244	3.06567	Smithian
AL2-54	6.74447	3.32667	Smithian
AL2-53	6.64422	3.00067	Smithian
AL2-52	6.55938	3.46433	Smithian
AL2-51	6.41028	2.43733	Smithian
AL2-50	6.28432	3.27867	Smithian
AL2-49	6.07352	4.30733	Smithian
AL2-48	5.93985	2.60758	Smithian
AL2-47	5.77532	3.47633	Smithian
AL3-16C	5.69487	3.47067	Smithian
AL3-16B	5.62527	3.29967	Smithian
AL3-16A	5.58315	3.44467	Smithian
AL3-15C	5.54103	3.39067	Smithian
AL3-15B	5.49524	3.94967	Smithian
AL3-15A	5.44945	3.51667	Smithian
AL3-14C	5.33956	3.45467	Smithian
AL3-14B	5.237	3.62267	Smithian
AL3-14A	5.11978	3.69467	Smithian
AL3-13C	4.96044	3.81767	Smithian
AL3-13B	4.83773	3.78067	Smithian
AL3-13A	4.72601	3.89567	Smithian
AL3-12C	4.62711	4.15967	Dienerian
AL3-12B	4.55018	3.36667	Dienerian
AL3-12A	4.45861	3.58267	Dienerian
AL2-46	4.40667	3.22033	Dienerian
AL2-45	4.32	3.71233	Dienerian
AL2-44	4.25111	4.46433	Dienerian
AL2-43	4.16	3.61633	Dienerian
AL2-42	4.13778	3.11833	Dienerian
AL2-41	4.11333	3.85233	Dienerian
AL2-40	4.08889	3.01133	Dienerian
AL2-39	4.06444	2.60633	Dienerian
AL2-38	4.04	3.05133	Dienerian
AL2-37	3.94	2.17933	Dienerian
AL2-36	3.73333		Dienerian
AL2-35	3.52222	3.31433	Dienerian
AL2-34	3.26667	2.9045	Dienerian
AL2-33	3	3.01833	Dienerian
AL2-32	2.75556	2.89633	Dienerian
AL2-31	2.65778	2.76133	Dienerian
AL2-30	2.57111	2.54933	Dienerian
AL2-29	2.46667	2.77033	Dienerian
AL2-28	2.35111	2.79133	Dienerian
AL2-27	2.25556	3.15533	Dienerian
AL2-26	2.18222	2.67833	Dienerian
AL2-25	2.04	2.67233	Dienerian
AL2-24	1.92667	2.58833	Dienerian
AL2-23	1.8	2.61633	Dienerian
AL2-22	1.66444	2.6215	Dienerian
AL2-21	1.53111	2.76233	Dienerian
AL2-20	1.43111	3.19667	Dienerian
AL2-19	1.32222	2.78867	Dienerian
AL2-18	1.24444	2.95767	Dienerian
AL2-17	1.14444	3.14133	Dienerian
AL2-16	1.02889	3.24533	Dienerian
AL2-15	0.944444	2.83567	Dienerian
AL2-14	0.844444	3.14133	Dienerian
AL2-13	0.753333	2.88567	Dienerian
AL2-12	0.688889	3.11433	Griesbach
AL2-11	0.582222	3.34033	Griesbach
AL2-10	0.482222	3.16333	Griesbach
AL2-9	0.373333	3.84033	Griesbach
AL2-8	0.251111	4.12633	Griesbach
AL2-7	0.111111	2.88533	Griesbach
AL2-6	0.00888889	4.12333	Griesbach
AL2-5	-0.05	3.72233	Wujiaping
AL1-16	-0.05	4.66733	Wujiaping
AL1-15	-0.15	3.74433	Wujiaping
AL2-4	-0.15	3.38233	Wujiaping
AL2-3	-0.25	3.27133	Wujiaping
AL1-14	-0.25	3.24533	Wujiaping
AL1-13	-0.35	3.71733	Wujiaping
AL2-2	-0.35	3.86767	Wujiaping
AL1-12	-0.45	3.50933	Wujiaping
AL2-1	-0.45	3.30333	Wujiaping
AL1-11	-0.55	3.65333	Wujiaping
AL1-10	-1.5	4.14833	Wujiaping
AL1-09	-2.5	3.98133	Wujiaping
AL1-08	-3.5	3.54633	Wujiaping
AL1-07	-4.5	3.05233	Wujiaping
AL1-06	-5.5	3.71833	Wujiaping
AL1-05	-6.5	3.48833	Wujiaping
AL1-04	-7.5	3.40133	Wujiaping
AL1-03	-8.5	3.24233	Wujiaping
AL1-02	-9.5	3.19733	Wujiaping
AL1-01	-10.5	3.93433	Wujiaping
